# Supplementary material for: Outcomes of Medicare beneficiaries hospitalised with transient ischaemic attack and stratification using the ABCD2 score
Source: HighWire-hosted journal article supplement (doi:10.1136/svn-2020-000372), 2020-11-04
Supplement: svn-2020-000372supp002_data_supplement.pdf [file svn-2020-000372supp002_data_supplement.pdf]

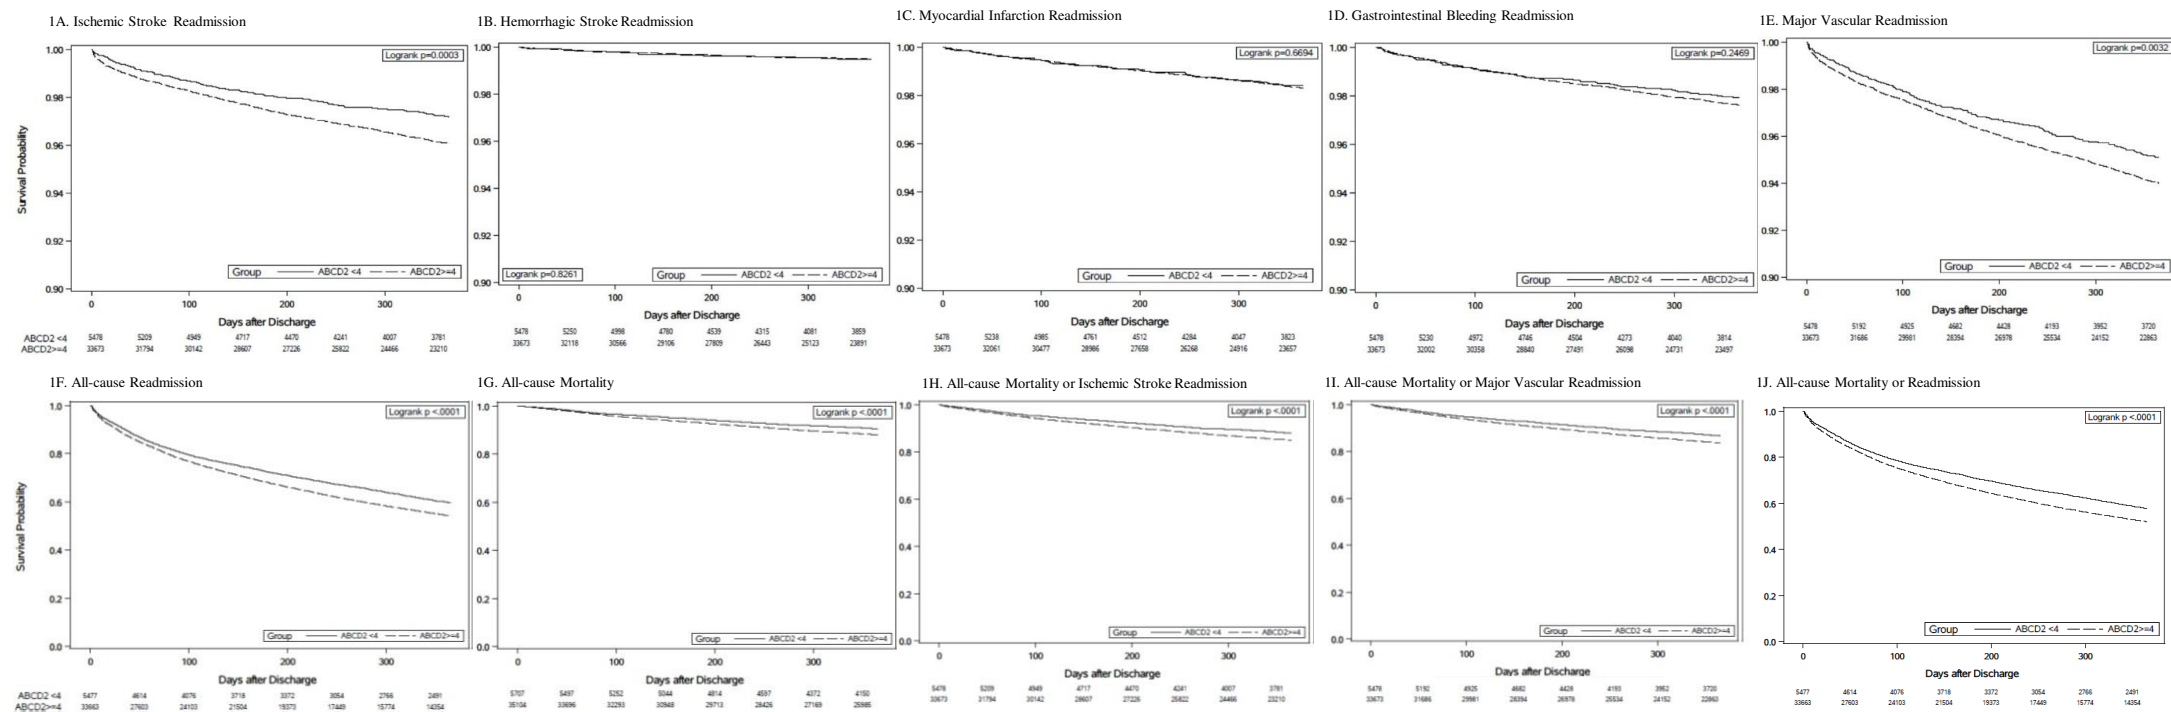

**Supplementary Figure S1:** One-year outcomes versus days after discharge from the index hospitalization for TIA according to ABCD<sup>2</sup> score.
